# Supplementary material for: Neural cell integration into 3D bioprinted skeletal muscle constructs accelerates restoration of muscle function
Source: PubMed Central journal article supplement (PMC7039897; doi:10.1038/s41467-020-14930-9), 2020-02-24
Supplement: 41467_2020_14930_MOESM1_ESM.pdf [file 41467_2020_14930_MOESM1_ESM.pdf]

## **Supplementary Information**

**Neural Cell Integration into 3D Bioprinted Skeletal Muscle Constructs Accelerates Restoration of Muscle Function**

Kim et al.

**Supplementary Table 1.** Quantification of human growth factors and cytokines detected in the hMPC- and hNSC-conditioned media.

| Growth factors/cytokines | MPCs (pg per ml) | NSCs (pg per ml)     |
|--------------------------|------------------|----------------------|
| BMP-4                    | 0.0*             | 7.4                  |
| EGF                      | 0.0*             | 6.4                  |
| EGF R                    | 250.7            | 273.0                |
| FGF-2                    | 0.0*             | 3.4                  |
| FGF-4                    | 0.0*             | 57.3                 |
| IGFBP-2                  | 7744.7           | 25453.9 <sup>†</sup> |
| Insulin                  | 0.0*             | 2924.2               |
| OPN                      | 1483.8           | 3232.5               |
| PDGF-AB                  | 4.9              | 124.2                |
| PDGF-BB                  | 3.9              | 70.1                 |
| PDGF Rb                  | 81.6             | 301.7                |
| VCAM-1                   | 829.5            | 2462.8               |
| VEGF R2                  | 2.9*             | 11.8                 |

BMP-4: bone morphogenetic protein 4, EGF: epidermal growth factor, EGF R: epidermal growth factor receptor, FGF: fibroblast growth factor, IGFBP-2: insulin-like growth factor-binding protein 2, OPN: osteopontin, PDGF: platelet-derived growth factor, PDGF Rb: platelet-derived growth factor receptor-beta, VCAM-1: vascular cell adhesion protein 1, VEGF R2: vascular endothelial growth factor receptor 2. \*Values below the limit of detection, and <sup>†</sup>values above the highest standards.

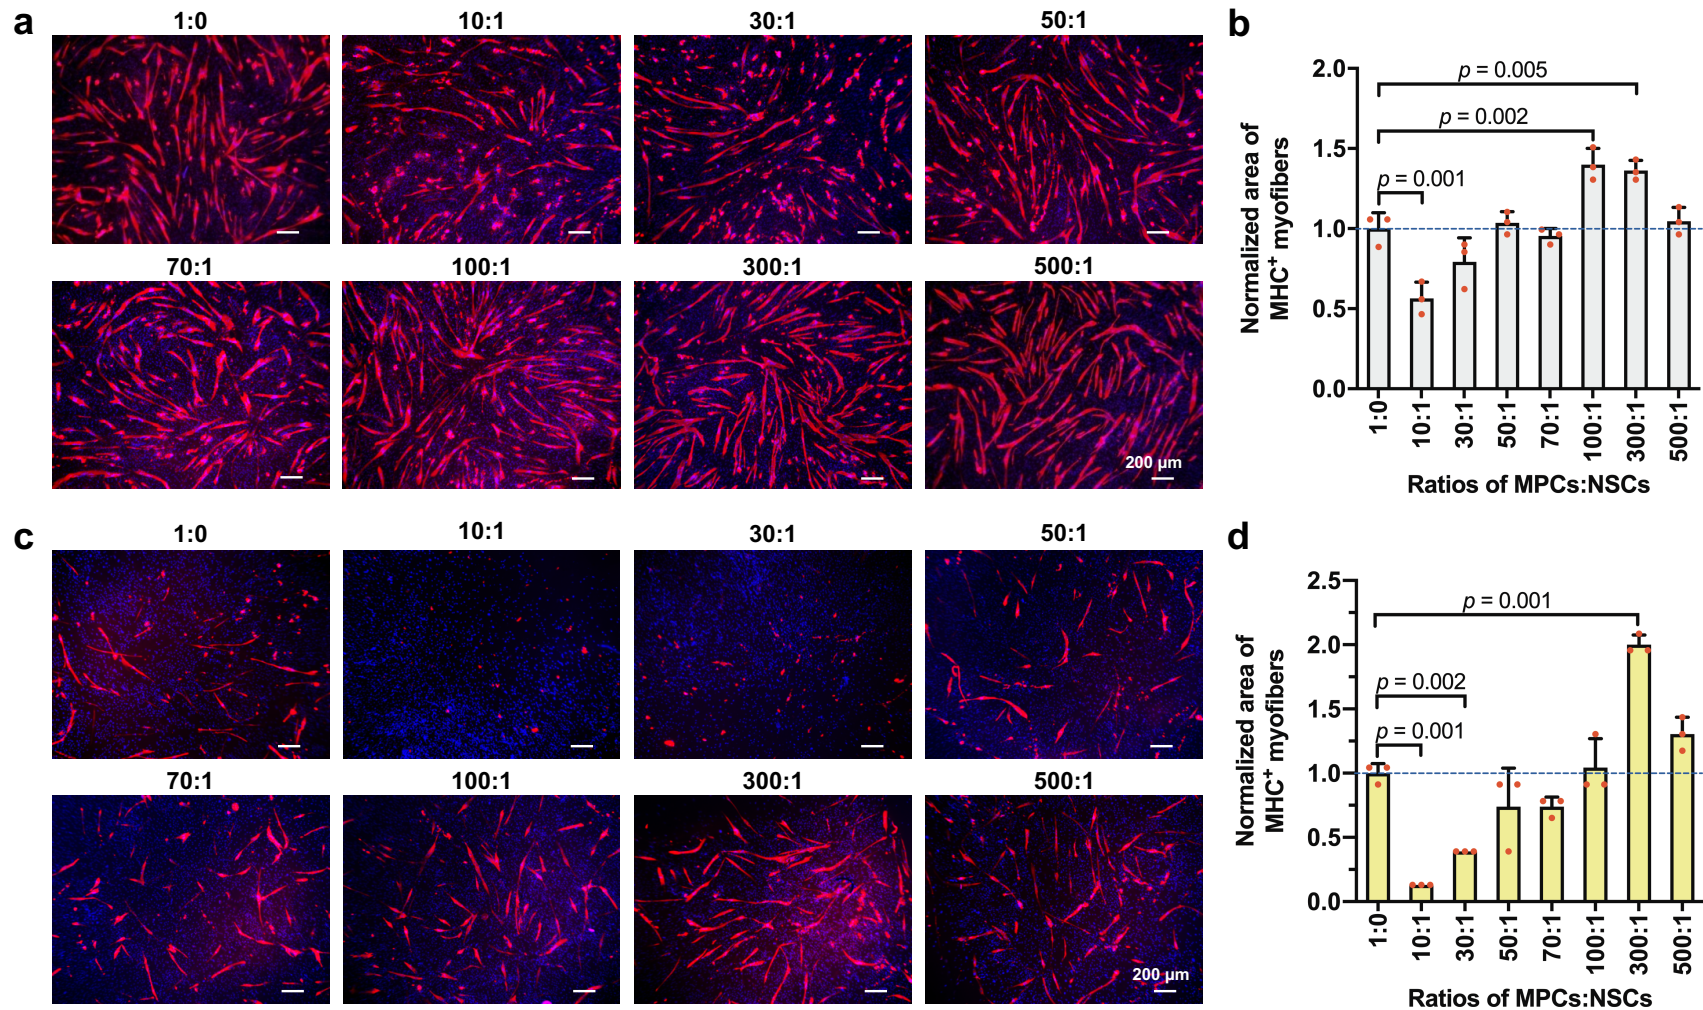

**Supplementary Fig. 1.** Myotube formation in 2D co-culture of hMPCs and hNSCs. Myotube formation and long-term survival were evaluated in different hMPCs:hNSCs ratios from 1:0 to 500:1 at 5 and 10 days of differentiation. Immunofluorescence for MHC

(red)/DAPI (blue) was performed at **a** 5 days and **c** 10 days in culture. The experimental findings were qualitatively reproduced three times. Quantitative data of the area of MHC<sup>+</sup> myofibers (normalized) at **b** 5 days and **d** 10 days in culture ( $n = 3$  per group). All data are represented as mean  $\pm$  SD. The  $p$ -values by one-way ANOVA followed by Tukey's test are indicated.

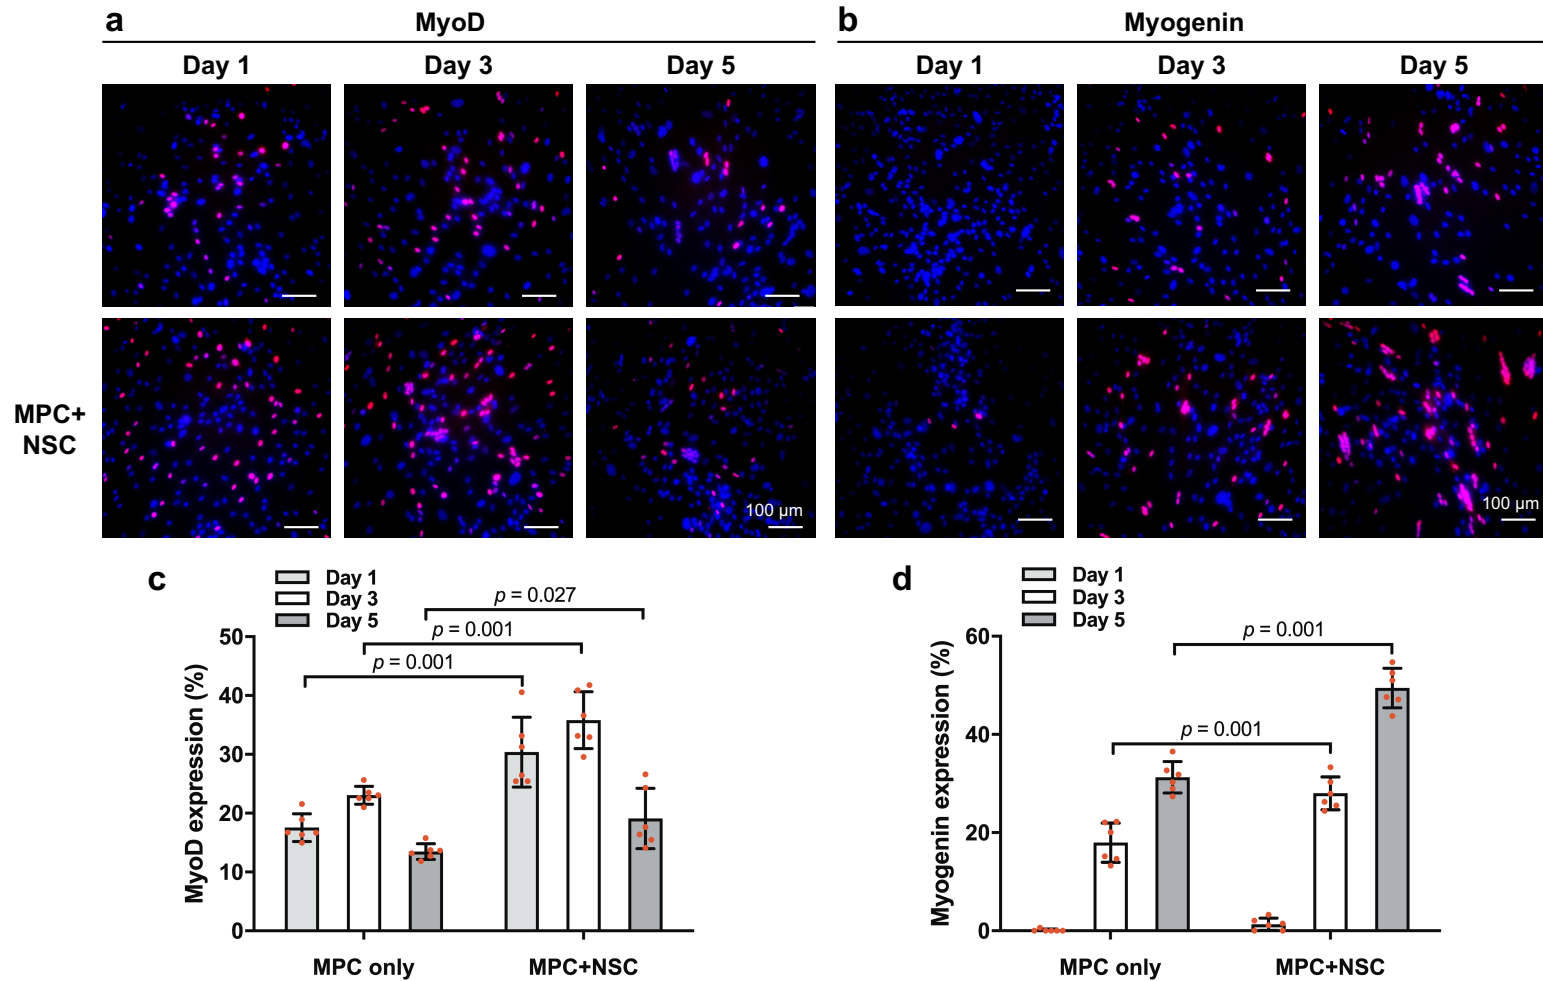

**Supplementary Fig. 2.** Immunofluorescence for **a** myoD and **b** myogenin at 1, 3, and 5 days in culture. The experimental findings were qualitatively reproduced three times. Quantification of **c** myoD and **d** myogenin expression in MPC and MPC+NSC (300:1) ( $n = 6$  per group and time point). All data are represented as mean  $\pm$  SD. The  $p$ -values by two-way ANOVA followed by Tukey's test are indicated.

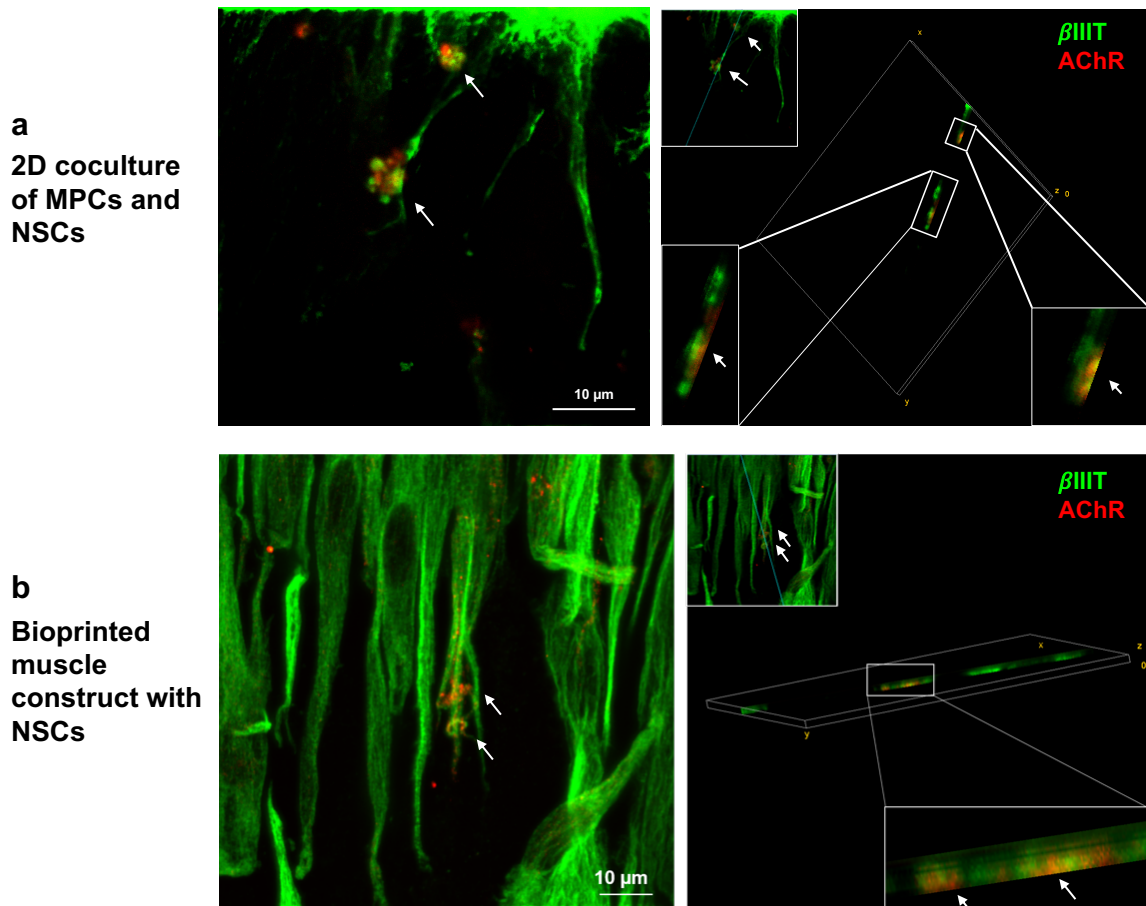

**Supplementary Fig. 3.** Neuromuscular junction formation. Immunofluorescence for  $\beta$ IIIT (green)/AChR (red) on (A) 2D co-culture and (B) bioprinted skeletal muscle construct (MPC+NSC). Z-stack confocal microscopy image (arrows,  $\beta$ IIIT<sup>+</sup> AChR<sup>+</sup> neuromuscular junctions). The experimental findings were qualitatively reproduced three times.

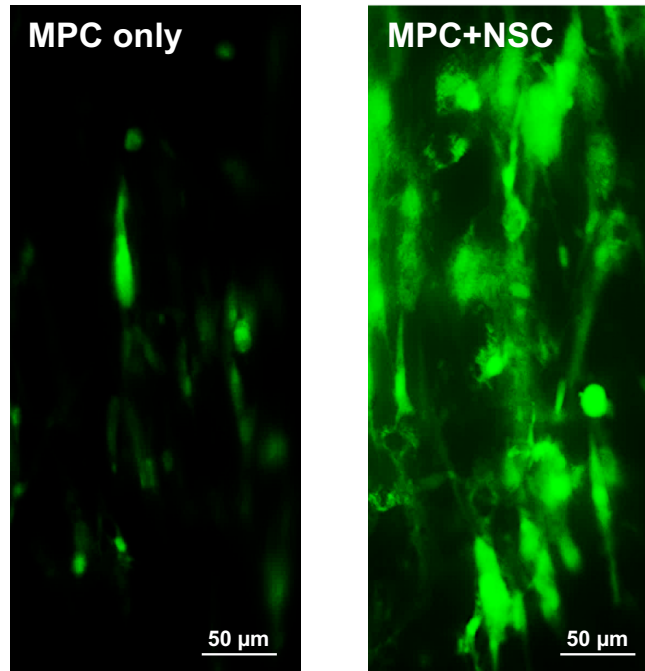

**Supplementary Fig. 4.** Calcium uptake images of the bioprinted skeletal muscle constructs (MPC only vs. MPC + NSC). Green fluorescence indicates intracellular calcium ions. The experimental findings were qualitatively reproduced three times.

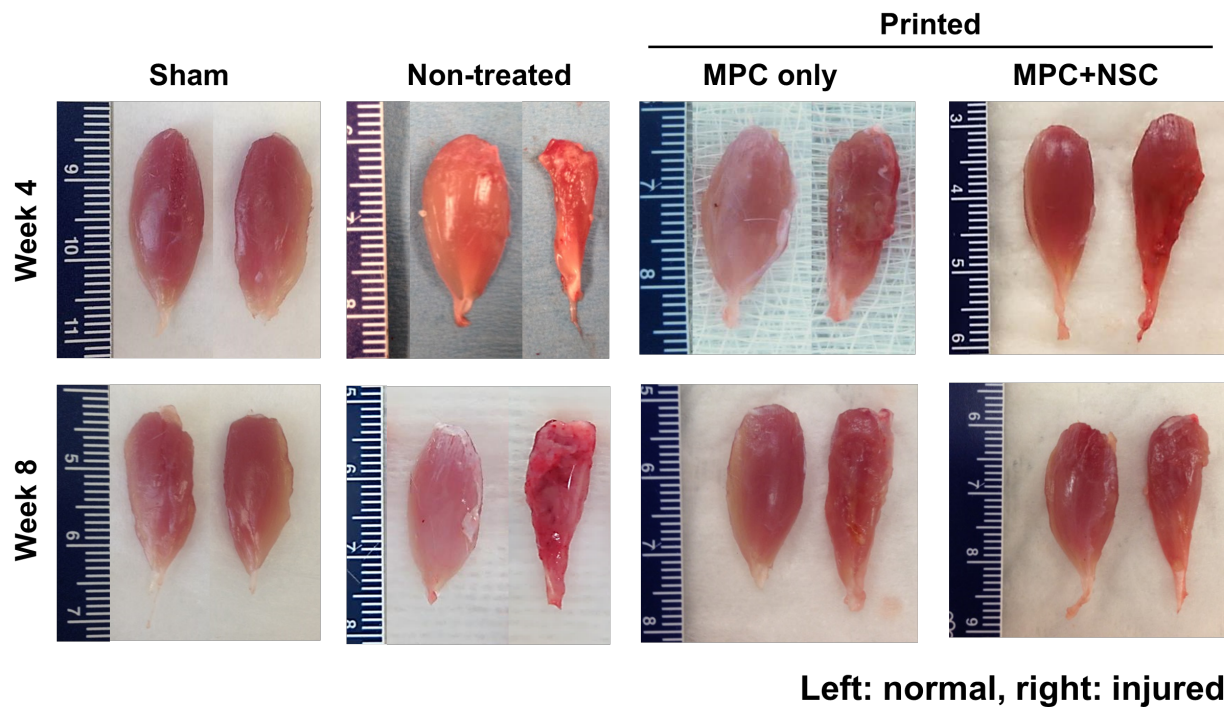

**Supplementary Fig. 5.** Gross appearance of TA muscles in the rat model of TA defect injury. The muscle defect was created by excising 40% of the TA muscle of the left leg; bioprinted skeletal muscle constructs were implanted into the defect sites. Harvested TA muscles of left legs (defective TA, right) and right legs (contralateral normal TA, left) at 4 and 8 weeks after implantation. The experimental findings were qualitatively reproduced three times.
